# Supplementary material for: Associations Between Magnitude of Child Maltreatment and Medicaid Expenditures for Psychotropic Medications
Source: Atypon-hosted journal article supplement (doi:10.1176/appi.ps.201500211), 2016-04-01
Supplement: appi.ps.201500211.ds001.pdf [file appi.ps.201500211.ds001.pdf]

Table 2: Logistic regression of three operationalizations of “dose” of maltreatment and Medicaid expenditures on psychotropic medication (N=4,453)

|                                                 | <b>Model 1</b>    | <b>95% CI</b> | <b>Model 2</b>    | <b>95% CI</b> | <b>Model 3</b>    | <b>95% CI</b> |
|-------------------------------------------------|-------------------|---------------|-------------------|---------------|-------------------|---------------|
|                                                 | <b>Odds Ratio</b> |               | <b>Odds Ratio</b> |               | <b>Odds Ratio</b> |               |
| Abuse type                                      |                   |               |                   |               |                   |               |
| Physical                                        | 1.38*             | 1.04 to 1.83  |                   |               |                   |               |
| Sexual                                          | 1.22              | 0.83 to 1.79  |                   |               |                   |               |
| Abandonment                                     | 0.80              | 0.60 to 1.07  |                   |               |                   |               |
| Neglect                                         | 1.19              | 0.73 to 1.95  |                   |               |                   |               |
| Count of Abuse                                  |                   |               | 1.12              | 0.90 to 1.38  |                   |               |
| Severity of Abuse                               |                   |               |                   |               |                   |               |
| Mild                                            |                   |               |                   |               | 1.10              | 0.75 to 1.61  |
| Moderate                                        |                   |               |                   |               | 1.14              | 0.78 to 1.68  |
| Severe                                          |                   |               |                   |               | 1.46              | 0.95 to 2.24  |
| Male                                            | 2.00*             | 1.55 to 2.58  | 1.97*             | 1.53 to 2.53  | 1.98*             | 1.53 to 2.55  |
| Age                                             |                   |               |                   |               |                   |               |
| 6-11                                            | 6.80*             | 4.25 to 10.89 | 6.77*             | 4.22 to 10.86 | 6.90*             | 4.30 to 11.09 |
| 12-13                                           | 7.27*             | 4.25 to 12.43 | 7.58*             | 4.42 to 12.99 | 7.70*             | 4.49 to 13.19 |
| ≥14                                             | 7.49*             | 4.41 to 12.74 | 7.87*             | 4.61 to 13.44 | 8.11*             | 4.74 to 13.87 |
| Race/ethnicity                                  |                   |               |                   |               |                   |               |
| Black                                           | 0.62*             | 0.45 to 0.87  | 0.62*             | 0.44 to 0.86  | 0.61*             | 0.44 to 0.86  |
| Hispanic                                        | 0.88              | 0.57 to 1.37  | 0.88              | 0.56 to 1.37  | 0.86              | 0.55 to 1.35  |
| Other/Unknown                                   | 0.97              | 0.57 to 1.65  | 0.92              | 0.54 to 1.56  | 0.91              | 0.54 to 1.56  |
| CBCL Score                                      |                   |               |                   |               |                   |               |
| Externalizing <i>t</i> score ≥ 64 (t score <64) | 4.32*             | 3.23 to 5.80  | 4.36*             | 3.25 to 5.85  | 4.41*             | 3.29 to 5.92  |
| Internalizing <i>t</i> score ≥ 64 (t score <64) | 1.40*             | 1.04 to 1.89  | 1.42*             | 1.06 to 1.91  | 1.41*             | 1.05 to 1.89  |
| Insurance type                                  |                   |               |                   |               |                   |               |
| Other, non-mental health carve out              | 0.92              | 0.47 to 1.81  | 0.88              | 0.45 to 1.73  | 0.92              | 0.47 to 1.80  |
| Primary care case management (PCCM)             | 0.62*             | 0.44 to 0.87  | 0.61*             | 0.43 to 0.86  | 0.63*             | 0.44 to 0.88  |
| Placement status                                |                   |               |                   |               |                   |               |
| Out of home                                     | 1.96*             | 1.48 to 2.60  | 1.86*             | 1.42 to 2.46  | 1.73*             | 1.28 to 2.33  |
| Health status                                   |                   |               |                   |               |                   |               |
| Bad                                             | 1.90*             | 1.30 to 2.76  | 1.86*             | 1.27 to 2.72  | 1.89*             | 1.29 to 2.77  |
| Residence                                       |                   |               |                   |               |                   |               |
| Rural                                           | 1.02              | 0.71 to 1.46  | 1.01              | 0.71 to 1.44  | 1.00              | 0.70 to 1.43  |

Note: \*significant at  $<.05$ ; CI = confidence interval.
